# Supplementary material for: Oregano Essential Oil Induces SOD1 and GSH Expression through Nrf2 Activation and Alleviates Hydrogen Peroxide-Induced Oxidative Damage in IPEC-J2 Cells
Source: PubMed Central journal article supplement (PMC5220500; doi:10.1155/2016/5987183), 2016-12-26
Supplement: 5987183.f1.pdf [file 5987183.f1.pdf]

# Certificate of Analysis

|          |                                             |            |            |
|----------|---------------------------------------------|------------|------------|
| Contact: | Ms Songrong Qu                              | Report No: | MGZ-0008   |
| Company: | Meritech Biotech                            | Our Ref:   | MGZ-GC-008 |
| Address: | Intl Bio-Island, Luoxuan 4 <sup>th</sup> Rd | Received:  | 10-12-11   |

|                        |          |        |
|------------------------|----------|--------|
| Rm 405 R&D Unit A      | Page No: | 1 of 1 |
| Guangzhou China 510300 |          |        |

## **ANALYSIS OF OREGANO OIL GC-MS**

| <b>Component</b>                    | <b>Oregano oil (MGZ-008)</b> |
|-------------------------------------|------------------------------|
|                                     | %                            |
| $\alpha$ -Thujene/ $\alpha$ -Pinene | 0.56                         |
| Camphene                            | 0.08                         |
| $\beta$ -Pinene                     | 0.09                         |
| Sabinene                            | 0.03                         |
| Myrcene                             | 0.91                         |
| $\alpha$ -Phellandrene              | 0.09                         |
| A-Terpinene                         | 0.50                         |
| Limonene                            | 0.15                         |
| 1,8-Cincole+ $\beta$ -phellandrene  | 0.07                         |
| $\beta$ -Ocimene                    | 0.07                         |
| r-Terpinene                         | 4.54                         |
| 3-Ocimene                           | 0.07                         |
| P-Cymene                            | 3.11                         |
| Terpinoiene                         | 0.05                         |
| 3-Octanoi                           | 0.11                         |
| 1-Octen-3-ol                        | 0.22                         |
| Dimethyl styrene                    | 0.10                         |
| Trans-Sabinene hydrate              | 0.14                         |

|                        |       |
|------------------------|-------|
| Linalool               | 0.32  |
| cis-Sabinene hydrate   | 0.03  |
| 1-Terpinol             | 0.05  |
| Terpinen-4-ol          | 0.22  |
| Carvacrol methyl ether | 0.33  |
| B-Caryophyllene        | 1.43  |
| Dihydrocarvone         | 0.09  |
| $\alpha$ -Humulene     | 0.08  |
| $\alpha$ -Terpineol    | 0.21  |
| Borneol                | 0.33  |
| $\beta$ -Bisabolene    | 0.71  |
| Caryophyllene oxide    | 0.16  |
| Thymol                 | 1.90  |
| Carvacrol              | 79.92 |

---

Signature

Songrong Qu

*These results relate only to the sample(s) tested and do not guarantee the bulk of the mentioned to the equal quality.*

**Figure 1. Typical chromatogram of oregano essential oil components.**

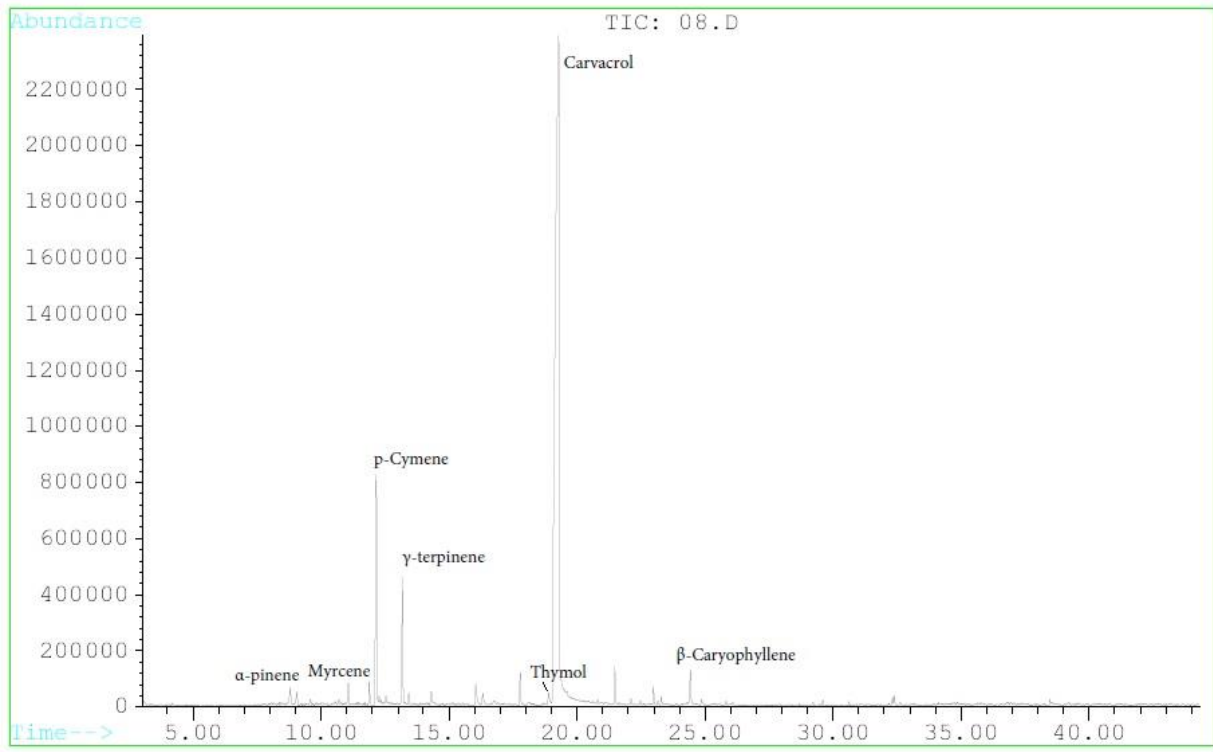

The Figure were provided by Meritech Bioengineering Co. Ltd.
